# Supplementary material for: Protective Effects of White Kidney Bean (Phaseolus vulgaris L.) against Diet-Induced Hepatic Steatosis in Mice Are Linked to Modification of Gut Microbiota and Its Metabolites
Source: MDPI journal article supplement (doi:10.3390/nu15133033), 2023-07-04
Supplement: s1 [file s1]

**Table S1.** Nutrients composition of experimental diets <sup>1</sup>.

| <b>Ingredient (g/kg)</b>              | <b>NCD</b> | <b>NCD-WKB</b> | <b>HFD</b> | <b>HFD-WKB</b> |
|---------------------------------------|------------|----------------|------------|----------------|
| White kidney bean                     | 0          | 200            | 0          | 200            |
| Casein, 80 Mesh                       | 189.56     | 142.62         | 258.45     | 211.51         |
| L-Cystine                             | 2.84       | 2.84           | 3.88       | 3.88           |
| Corn Starch                           | 479.79     | 385.73         | 0          | 0              |
| Maltodextrin 10                       | 118.48     | 108.58         | 161.53     | 67.47          |
| Sucrose                               | 65.21      | 73.74          | 88.91      | 88.91          |
| Cellulose, BW200                      | 47.39      | 0.00           | 64.61      | 11.81          |
| Soybean Oil                           | 23.7       | 21.9           | 32.31      | 26.11          |
| Lard                                  | 18.96      | 18.96          | 316.6      | 316.6          |
| Mineral Mix                           | 9.48       | 9.48           | 12.92      | 12.92          |
| DiCalcium Phosphate                   | 12.32      | 12.32          | 16.8       | 16.8           |
| Calcium Carbonate                     | 5.21       | 5.21           | 7.11       | 7.11           |
| Potassium Citrate, 1 H <sub>2</sub> O | 15.64      | 15.64          | 21.32      | 21.32          |
| Vitamin Mix, V10001                   | 9.48       | 0.95           | 12.92      | 12.92          |
| Choline Bitartrate                    | 1.9        | 1.90           | 2.58       | 2.58           |
| FD&C Yellow Dye #5                    | 0.04       | 0.04           | 0          | 0              |
| FD&C Blue Dye #1                      | 0.01       | 0.01           | 0.07       | 0.07           |
| Total                                 | 1000       | 1000           | 1000       | 1000           |
| <b>% Energy and their source</b>      |            |                |            |                |
| Protein                               | 20         | 20             | 20         | 20             |
| Carbohydrate                          | 70         | 70             | 20         | 20             |
| Fat                                   | 10         | 10             | 60         | 60             |
| Total                                 | 100        | 100            | 100        | 100            |

<sup>1</sup> To equalize protein, fat, dietary fiber, and carbohydrate contents (g/kg diet) between the NCD and NCD-WKB diets, HFD and HFD-WKB diets, casein, soybean oil, cellulose, and maltodextrin were reduced in the NCD-WKB and HFD-WKB diets, respectively. Proximate nutritional composition of WKB (dry weight basis, g/100 g): protein 23.47; fat 3.10; total dietary fiber 26.40; carbohydrate 42.64; ash 4.39.

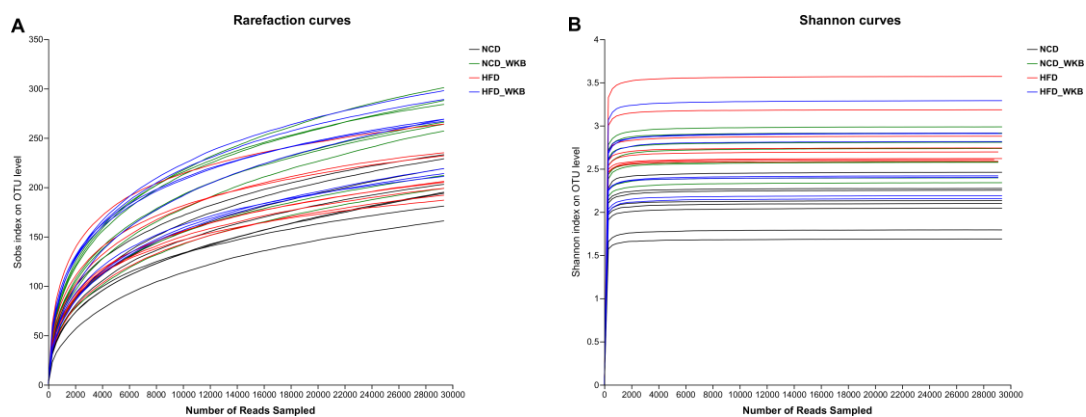

**Figure S1.** The Rarefaction curve (A) and Shannon index curve (B).

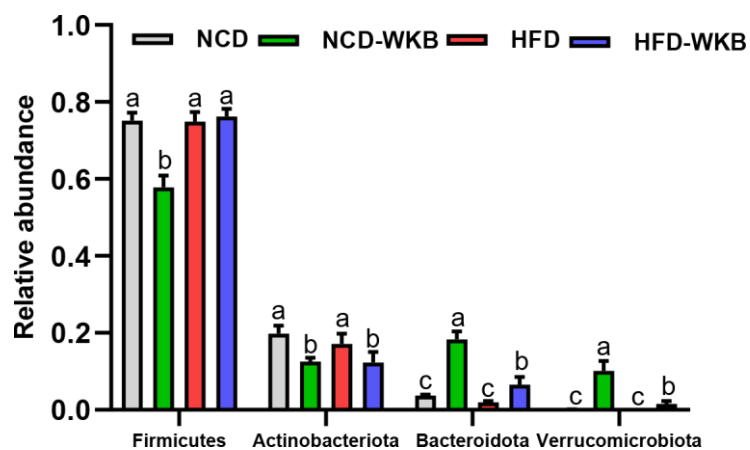

**Figure S2.** Relative abundance of gut microbiota at the Phylum level. The different letters on the top of graph bars represented statistical significance ( $p < 0.05$ ).

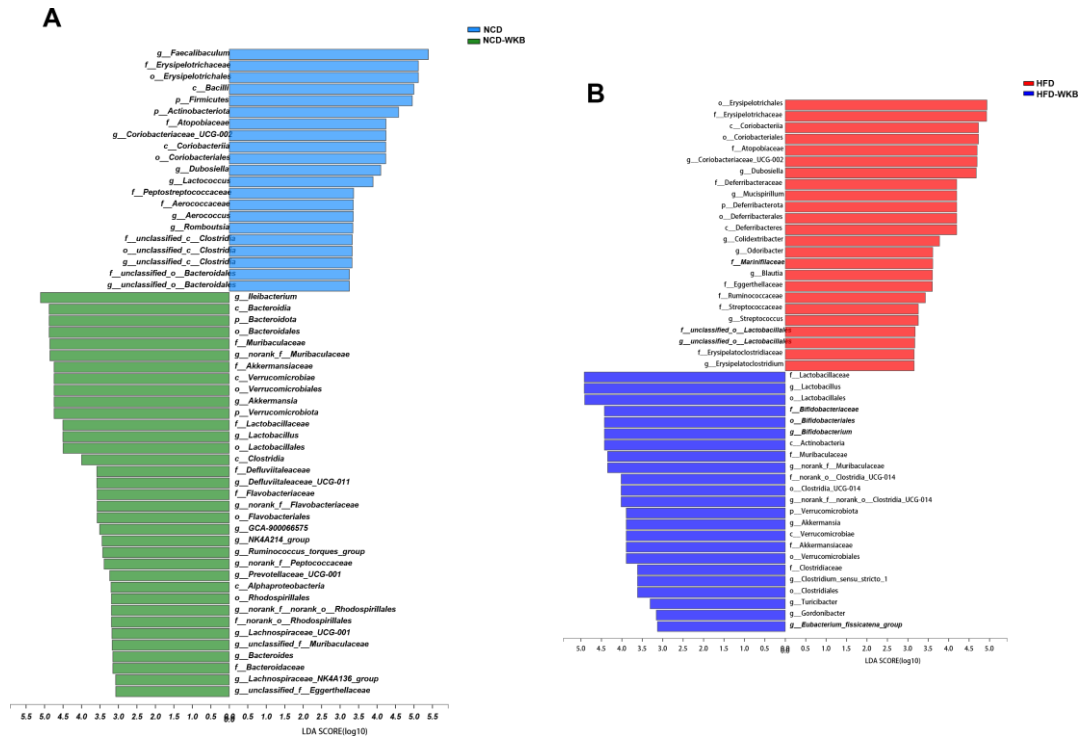

Figure S3. Key phylotypes of the gut microbiota in response to WKB supplementation.
